# Supplementary material
Source: PubMed Central journal article supplement (PMC7494052)
Supplement: NIHMS1548224-supplement-1.pdf [file NIHMS1548224-supplement-1.pdf]

## Supplementary Tables

Supplementary Table 1

*Ethnic group differences in post-trial pain rating*

| Measure                               | <i>t</i>     | <i>df</i> | <i>p</i>         | <i>b</i>    | CI                 |
|---------------------------------------|--------------|-----------|------------------|-------------|--------------------|
| <b>Within-trial pain intensity</b>    |              |           |                  |             |                    |
| Temperature                           | <b>17.02</b> | <b>84</b> | <b>&lt; .001</b> | <b>6.68</b> | <b>5.92, 7.44</b>  |
| AA - (HA + WA)                        | <b>2.79</b>  | <b>84</b> | <b>.007</b>      | <b>9.73</b> | <b>2.97, 16.49</b> |
| HA - WA                               | .09          | 84        | .93              | .18         | -3.63, 3.98        |
| [AA - (HA + WA)] * Temp               | <b>2.50</b>  | <b>84</b> | <b>.01</b>       | <b>2.12</b> | <b>.47, 3.78</b>   |
| [HA - WA] * Temp                      | .26          | 84        | .80              | .12         | -.80, 1.04         |
| Temp AA                               | 10.27        | 26        | <b>&lt; .001</b> | 8.15        | 6.60, 9.71         |
| Temp HA                               | 10.58        | 28        | <b>&lt; .001</b> | 6.14        | 4.99, 7.30         |
| Temp WA                               | 12.39        | 28        | <b>&lt; .001</b> | 5.90        | 4.96, 6.83         |
| <b>Post-trial pain intensity</b>      |              |           |                  |             |                    |
| <b>Temperature</b>                    | <b>10.16</b> | <b>84</b> | <b>&lt; .001</b> | <b>6.29</b> | <b>5.09, 7.49</b>  |
| AA - (HA + WA)                        | 1.72         | 84        | .09              | 5.25        | -.61, 11.10        |
| HA - WA                               | -.42         | 84        | .68              | -.71        | -3.99, 2.57        |
| <b>[AA - (HA + WA)] * Temp</b>        | <b>1.53</b>  | <b>84</b> | <b>.13</b>       | <b>2.06</b> | <b>-.56, 4.67</b>  |
| [HA - WA] * Temp                      | .90          | 84        | .37              | .67         | -.77, 2.10         |
| <b>Post-trial pain unpleasantness</b> |              |           |                  |             |                    |
| <b>Temperature</b>                    | <b>9.37</b>  | <b>84</b> | <b>&lt; .001</b> | <b>5.80</b> | <b>4.60, 7.01</b>  |
| <b>AA - (HA + WA)</b>                 | <b>2.81</b>  | <b>84</b> | <b>.01</b>       | <b>9.04</b> | <b>2.81, 15.27</b> |
| HA - WA                               | -.98         | 84        | .33              | -1.77       | -5.27, 1.72        |
| [AA - (HA + WA)] * Temp               | 1.75         | 84        | .08              | 2.36        | -.26, 5.00         |
| [HA - WA] * Temp                      | -.04         | 84        | .97              | -.03        | -1.47, 1.41        |

Note: Statistics are from linear mixed effects models in R with single heat trial pain rating values as the dependent variable (only ¼ of heat trials per person (n = 9) had post-trial pain ratings). Participant gender, ethnicity contrasts, temperature, and the interaction of each ethnicity contrast with temperature were fixed factors and subject with a random slope for temperature were random factors. Temperature = linear temperature contrast (L(-1), M (0), H (1)); AA = African American, HA = Hispanic American, WA = non-Hispanic White American. Temp AA, Temp HA, and Temp WA refer to temperature effects from parallel models in each ethnic group separately. Bold:  $p \leq .05$ .

Supplementary Table 2

*Self-report measures of sociocultural variables hypothesized to influence pain report by ethnic group*

| Measure                                   | African American |                    | White American |                     | Hispanic American |                     | t-test: AA > (HA + WA) |           |                 |                   |              |                     |
|-------------------------------------------|------------------|--------------------|----------------|---------------------|-------------------|---------------------|------------------------|-----------|-----------------|-------------------|--------------|---------------------|
|                                           | N                | M(SD)              | N              | M(SD)               | N                 | M(SD)               | t                      | df        | p               | p <sub>corr</sub> | b            | CI                  |
| Pain precursors: Stressful experiences    |                  |                    |                |                     |                   |                     |                        |           |                 |                   |              |                     |
| SES                                       | 27               | 40.36 (7.01)       | 30             | 44.1 (9.26)         | 29                | 38.21 (11.23)       | -0.37                  | 83        | .72             | 1                 | -0.8         | -5.13, 3.54         |
| <b>Discrimination response</b>            | <b>24</b>        | <b>4.53 (1.5)</b>  | <b>28</b>      | <b>3.29 (1.7)</b>   | <b>29</b>         | <b>2.86 (1.75)</b>  | <b>3.6</b>             | <b>78</b> | <b>&lt;.001</b> | <b>.01</b>        | <b>1.45</b>  | <b>.65, 2.26</b>    |
| <b>Discrimination frequency</b>           | <b>25</b>        | <b>16.4 (5.89)</b> | <b>29</b>      | <b>7.24 (6.32)</b>  | <b>29</b>         | <b>8.08 (7.27)</b>  | <b>5.58</b>            | <b>80</b> | <b>&lt;.001</b> | <b>&lt;.001</b>   | <b>8.74</b>  | <b>5.62, 11.86</b>  |
| Traumatic life events                     | 28               | 5.68 (5.91)        | 30             | 6.37 (4.28)         | 29                | 5.76 (3.83)         | -0.35                  | 84        | .73             | 1                 | -0.38        | -2.55, 1.78         |
| History of pain incidents                 | 28               | 0.29 (.53)         | 30             | 0.93 (1.20)         | 30                | 0.97 (1.40)         | -2.59                  | 85        | .01             | .21               | -0.66        | -1.17, .15          |
| History of pain severity                  | 28               | 9.5 (17.81)        | 30             | 22.26 (23.95)       | 30                | 16.69 (21.23)       | -2.05                  | 85        | .04             | .82               | -9.98        | -19.63, -.32        |
| Pain precursors: Mood                     |                  |                    |                |                     |                   |                     |                        |           |                 |                   |              |                     |
| General positive mood                     | 28               | 39.84 (7.34)       | 30             | 37.07 (6.8)         | 30                | 35.99 (7.37)        | 2.02                   | 85        | .05             | .89               | 3.31         | .05, 6.58           |
| Positive mood day of scan                 | 28               | 34.75 (6.66)       | 30             | 31.03 (6.6)         | 30                | 31.37 (7.73)        | 2.21                   | 85        | .03             | .57               | 3.55         | .35, 6.75           |
| General negative mood                     | 28               | 16.04 (5.85)       | 30             | 16.2 (4.29)         | 30                | 17.06 (7.21)        | -0.44                  | 85        | .66             | 1                 | -0.6         | -3.28, 2.09         |
| Negative mood day of scan                 | 28               | 16.18 (4.85)       | 30             | 14.93 (2.84)        | 30                | 15.53 (2.94)        | 1.14                   | 85        | .26             | 1                 | 0.95         | -.71, 2.60          |
| State anxiety day of scan                 | 28               | 31 (8.43)          | 30             | 33.77 (8.72)        | 30                | 33.03 (8.18)        | -1.24                  | 85        | .22             | 1                 | -2.40        | -6.24, 1.44         |
| Worry                                     | 25               | 37.52 (14.06)      | 29             | 41.34 (15.07)       | 28                | 46.07 (13.47)       | -1.81                  | 79        | .07             | 1                 | -6.19        | -12.98, .61         |
| Pain precursors: Beliefs and expectations |                  |                    |                |                     |                   |                     |                        |           |                 |                   |              |                     |
| Fear of Pain                              | 28               | 68.74 (23.08)      | 30             | 69.13 (19.45)       | 30                | 70.97 (15.83)       | -0.29                  | 85        | .77             | 1                 | -1.31        | -10.22, 7.61        |
| Pain beliefs physical                     | 25               | 27.49 (6.03)       | 29             | 25.28 (6.89)        | 29                | 24.09 (7.86)        | 1.67                   | 80        | .10             | 1                 | 2.8          | -.54, 6.14          |
| Pain beliefs psychological                | 25               | 18.04 (3.4)        | 29             | 17.83 (4.04)        | 29                | 16.93 (4.22)        | 0.7                    | 80        | .48             | 1                 | 0.66         | -1.21, 2.53         |
| Pain responses                            |                  |                    |                |                     |                   |                     |                        |           |                 |                   |              |                     |
| Pain catastrophizing trait                | 26               | 8.35 (9.83)        | 30             | 10.73 (6.96)        | 29                | 14.17 (9.26)        | -2.00                  | 82        | .05             | .92               | -4.11        | -8.18, -.03         |
| Physiological reactivity                  | 27               | 66.97 (11.38)      | 30             | 64.76 (11.75)       | 30                | 65.2 (12.75)        | .72                    | 84        | .48             | 1                 | 1.99         | -3.53, 7.52         |
| Pain context and communication            |                  |                    |                |                     |                   |                     |                        |           |                 |                   |              |                     |
| <b>Trust in experimenter</b>              | <b>28</b>        | <b>41.55 (5.4)</b> | <b>28</b>      | <b>45.43 (4.37)</b> | <b>30</b>         | <b>45.44 (4.73)</b> | <b>-3.49</b>           | <b>83</b> | <b>&lt;.001</b> | <b>.01</b>        | <b>-3.89</b> | <b>-6.11, -1.67</b> |
| Similarity to experimenter                | 26               | 22.44 (4.96)       | 27             | 21.69 (5.12)        | 28                | 22.54 (4.25)        | .28                    | 78        | .78             | 1                 | 0.32         | -1.94, 2.59         |

Note: Ethnicity differences in sociocultural self-report measures. Statistics are from linear models in R (command lm) with each self-report measure listed as the dependent variable and the two orthogonal ethnicity contrasts used in the pain rating analyses as the predictors. Only the AA - (HA + WA) contrast is

reported here. *P* values are corrected by multiplying by 19 statistical tests using Bonferroni correction ( $p_{\text{corr}}$  in table). AA = African American, HA = Hispanic American, WA = non-Hispanic White American. Bold:  $p_{\text{corr}} \leq .05$ .

Supplementary Table 3

Results of ethnicity-discrimination-pain mediation analyses

|                        | a                 | b                 | c'             | c              | ab                |
|------------------------|-------------------|-------------------|----------------|----------------|-------------------|
|                        | stim-discr.       | discr.-pain       | ethnicity-pain | ethnicity-pain | eth.-discr.-pain  |
| Y = Average pain (AUC) |                   |                   |                |                |                   |
| <i>z</i>               | <b>2.92</b>       | <b>2.00</b>       | 1.37           | 1.89           | <b>2.12</b>       |
| <i>p</i>               | <b>.004</b>       | <b>.05</b>        | .17            | .06            | <b>.03</b>        |
| <i>b</i>               | <b>1.26</b>       | <b>1.67</b>       | 5.00           | 7.18           | <b>2.17</b>       |
| CI                     | <b>.98, 1.54</b>  | <b>1.07, 2.30</b> | 2.69, 8.34     | 4.60, 10.79    | <b>1.34, 3.42</b> |
| Y = H vs. L pain (AUC) |                   |                   |                |                |                   |
| <i>z</i>               | <b>3.46</b>       | <b>2.35</b>       | 1.07           | 1.91           | <b>2.55</b>       |
| <i>p</i>               | <b>&lt; .001</b>  | <b>.02</b>        | .28            | .06            | <b>.01</b>        |
| <i>b</i>               | <b>1.42</b>       | <b>.94</b>        | 1.77           | 3.10           | <b>1.34</b>       |
| CI                     | <b>1.16, 1.69</b> | <b>.61, 1.19</b>  | .63, 2.92      | 1.89, 4.42     | <b>.90, 1.89</b>  |

Note: Statistics are from two single-level mediation analyses between participant ethnicity (AA – [HA + WA]), response to discrimination scores from the William’s Questionnaire, and pain rating either averaged across all three levels of painful stimulus intensity (Y = Average pain (AUC)) or the difference between high and low stimulus intensity (Y = H vs. L pain (AUC)). Participant gender, and the [HA – WA] contrast were controlled for as second level covariates. Bootstrapping was used for significance testing and two-tailed *p*-values were calculated from the bootstrap confidence interval. Path *c* = statistical relationship between X and Y. Path *c*’ = statistical relationship between X and Y controlling for mediator. Bold:  $p \leq .05$ .

## Supplementary Table 4

*Regions showing stronger dose-response effects of painful heat in AA participants*

| Region                     | x   | y   | z   | Volume (mm <sup>3</sup> ) | Maxstat |
|----------------------------|-----|-----|-----|---------------------------|---------|
| L parahippocampal gyrus    | -14 | -10 | -26 | 248                       | 5.81    |
| R amygdala                 | 12  | -6  | -18 | 1144                      | 10.17   |
| R frontal orbital cortex   | 16  | 10  | -16 | 656                       | 9.31    |
| L subcallosal cortex       | -6  | 24  | -20 | 2072                      | 11.94   |
| R subcallosal cortex       | 2   | 18  | -20 | 496                       | 7.63    |
| L frontal medial cortex    | -4  | 38  | -18 | 2776                      | 14.04   |
| L frontal orbital cortex   | -14 | 4   | -18 | 1456                      | 14.60   |
| R frontal medial cortex    | 6   | 40  | -14 | 1616                      | 12.01   |
| L putamen                  | -20 | 14  | -12 | 1296                      | 9.20    |
| L accumbens                | -6  | 0   | -8  | 912                       | 10.09   |
| R accumbens                | 10  | 4   | -8  | 2136                      | 15.98   |
| R anterior cingulate gyrus | 8   | 32  | -6  | 240                       | 6.37    |
| R paracingulate gyrus      | 6   | 50  | -2  | 1720                      | 13.20   |
| L paracingulate gyrus      | -6  | 50  | 2   | 960                       | 7.30    |
| R caudate                  | 22  | 14  | 12  | 872                       | 7.83    |
| R thalamus                 | 18  | -18 | 16  | 256                       | 8.93    |
| L frontal pole             | -44 | 42  | 4   | 1848                      | 11.8    |
| L middle frontal gyrus     | -34 | 20  | 42  | 792                       | 8.49    |
| R frontal pole             | 36  | 54  | 18  | 1672                      | 11.28   |

Note: Significant positive clusters and subclusters from an interaction contrast from a second-level GLM analysis comparing AA with other participants [AA - (HA + WA)] on the high vs. low painful stimulus intensity contrast. Covariates were participant gender, fMRI sequence (multiband or standard), and the [HA - WA] contrast. Clusters are labeled using the highest probability region from the Harvard-Oxford probabilistic cortical atlas. Only the cluster/subcluster with the highest Maxstat from each region and side of the brain are included. Maxstat =  $\log(1/p)$ . Statistical threshold: FDR corrected  $q < .05$  ( $p < .000047$ ). AA = African American, HA = Hispanic American, WA = Non-Hispanic White American.

Supplementary Table 5

Results of stimulus-brain-pain mediation analyses with whole-brain GLM ROIs

|                               | a                | b               | c'                    | c                     | ab                 |
|-------------------------------|------------------|-----------------|-----------------------|-----------------------|--------------------|
|                               | stim-brain       | brain-pain      | stim-pain             | stim-pain             | stim-brain-pain    |
| vmPFC                         |                  |                 |                       |                       |                    |
| <i>z</i>                      | <b>2.30</b>      | 1.17            | <b>3.54</b>           | <b>3.58</b>           | .76                |
| <i>p</i>                      | <b>0.02</b>      | 0.24            | <b>&lt; .001</b>      | <b>&lt; .001</b>      | 0.45               |
| <i>b</i>                      | <b>0.04</b>      | 46.69           | <b>546.38</b>         | <b>555.57</b>         | 2.75               |
| CI                            | <b>.01, .07</b>  | -29.33, 121.29  | <b>492.42, 599.49</b> | <b>504.64, 606.63</b> | -3.72, 10.03       |
| vmPFC x Race [AA – (HA + WA)] |                  |                 |                       |                       |                    |
| <i>z</i>                      | <b>2.98</b>      | .03             | .46                   | .36                   | -.99               |
| <i>p</i>                      | <b>0.003</b>     | 0.98            | 0.65                  | 0.72                  | 0.32               |
| <i>b</i>                      | <b>0.10</b>      | 2.16            | 28.77                 | 20.53                 | -8.16              |
| CI                            | <b>.03, .16</b>  | -149.75, 146.60 | -88.11, 155.57        | -89.63, 143.81        | -22.60, 7.35       |
| mFG                           |                  |                 |                       |                       |                    |
| <i>z</i>                      | <b>3.67</b>      | .75             | <b>3.58</b>           | <b>3.59</b>           | <b>2.87</b>        |
| <i>p</i>                      | <b>&lt; .001</b> | .45             | <b>&lt; .001</b>      | <b>&lt; .001</b>      | <b>.004</b>        |
| <i>b</i>                      | <b>.05</b>       | 28.54           | <b>537.21</b>         | <b>555.57</b>         | <b>9.12</b>        |
| CI                            | <b>.02, .08</b>  | -46.38, 106.63  | <b>485.51, 587.93</b> | <b>504.25, 606.85</b> | <b>2.62, 15.39</b> |
| mFG x Race [AA – (HA + WA)]   |                  |                 |                       |                       |                    |
| <i>z</i>                      | <b>2.59</b>      | .24             | .24                   | .36                   | .41                |
| <i>p</i>                      | <b>.01</b>       | .81             | .81                   | .72                   | .68                |
| <i>b</i>                      | <b>0.08</b>      | 21.80           | 12.33                 | 20.53                 | 3.39               |
| CI                            | <b>.02, .15</b>  | -142.26, 178.56 | -100.05, 135.06       | -89.80, 144.60        | -12.96, 19.50      |
| NAc                           |                  |                 |                       |                       |                    |
| <i>z</i>                      | <b>3.36</b>      | 1.55            | <b>3.64</b>           | <b>3.63</b>           | <b>2.20</b>        |
| <i>p</i>                      | <b>&lt; .001</b> | 0.12            | <b>&lt; .001</b>      | <b>&lt; .001</b>      | <b>0.03</b>        |
| <i>b</i>                      | <b>.09</b>       | 64.61           | <b>539.83</b>         | <b>555.57</b>         | <b>7.67</b>        |
| CI                            | <b>.05, .11</b>  | -15.98, 144.82  | <b>48.99, 591.63</b>  | <b>504.41, 607.06</b> | <b>.61, 14.29</b>  |
| NAc x Race [AA – (HA + WA)]   |                  |                 |                       |                       |                    |
| <i>z</i>                      | 1.35             | -.97            | .36                   | .35                   | .30                |
| <i>p</i>                      | .18              | .33             | .72                   | .73                   | .76                |
| <i>b</i>                      | .06              | -78.68          | 21.24                 | 20.53                 | 2.51               |
| CI                            | -.03, .14        | -232.16, 70.44  | -90.74, 139.14        | -91.55, 144.10        | -14.22, 20.24      |
| mPFC                          |                  |                 |                       |                       |                    |
| <i>z</i>                      | <b>3.49</b>      | 1.29            | <b>3.62</b>           | <b>3.59</b>           | <b>3.31</b>        |
| <i>p</i>                      | <b>&lt; .001</b> | .20             | <b>&lt; .001</b>      | <b>&lt; .001</b>      | <b>&lt; .001</b>   |
| <i>b</i>                      | <b>.08</b>       | 44.01           | <b>537.09</b>         | <b>555.57</b>         | <b>10.47</b>       |
| CI                            | <b>.04, .11</b>  | -22.75, 112.90  | <b>482.37, 590.85</b> | <b>505.15, 606.70</b> | <b>3.93, 17.55</b> |
| mPFC x Race [AA – (HA + WA)]  |                  |                 |                       |                       |                    |
| <i>z</i>                      | 1.67             | .85             | -.05                  | .34                   | <b>2.00</b>        |
| <i>p</i>                      | .10              | .40             | .96                   | .73                   | <b>.046</b>        |
| <i>b</i>                      | .07              | 62.01           | -4.16                 | 20.53                 | <b>17.88</b>       |
| CI                            | -.02, .15        | -66.03, 207.42  | -122.59, 122.71       | -89.24, 145.77        | <b>1.22, 43.33</b> |

Note: Statistics are from four moderated, multi-level mediation analyses between painful stimulus intensity, regions showing steeper dose-response effects of painful heat in AA participants (mPFC, vmPFC, mFG, and NAc ROIs), and trial-by-trial pain rating, moderated by participant ethnicity [AA – (HA + WA)] and controlling for participant gender, fMRI pulse sequence, and the [HA – WA] contrast. Path c = statistical relationship between X and Y. Path c' = statistical relationship between X and Y controlling for mediator. Bold:  $p \leq .05$ .

Supplementary Table 6

Results of stimulus-vmPFC-NAc-pain mediation analyses

|                                    | b1         | b2               | b3            | c'                    | c                     | ab                  |
|------------------------------------|------------|------------------|---------------|-----------------------|-----------------------|---------------------|
|                                    | stim-vmPFC | vmPFC-NAc        | NAc-Pain      | stim-pain             | stim-pain             | stim-brain-pain     |
| All Participants                   |            |                  |               |                       |                       |                     |
| <i>z</i>                           | 1.63       | <b>3.76</b>      | 1.33          | <b>4.27</b>           | <b>3.73</b>           | -1.66               |
| <i>p</i>                           | .10        | <b>&lt; .001</b> | .18           | <b>&lt; .001</b>      | <b>&lt; .001</b>      | .10                 |
| <i>b</i>                           | .02        | <b>.46</b>       | 60.52         | <b>549.38</b>         | <b>549.89</b>         | -.83                |
| CI                                 | .01, .03   | <b>.44, .48</b>  | 29.47, 91.39  | <b>520.42, 584.38</b> | <b>528.29, 570.48</b> | -1.17, -.50         |
| AA Participants Only               |            |                  |               |                       |                       |                     |
| <i>z</i>                           | 3.11       | <b>3.93</b>      | .56           | <b>4.75</b>           | <b>3.95</b>           | <b>-2.11</b>        |
| <i>p</i>                           | .002       | <b>&lt; .001</b> | .58           | <b>&lt; .001</b>      | <b>&lt; .001</b>      | <b>.035</b>         |
| <i>b</i>                           | .09        | <b>.37</b>       | 45.65         | <b>651.04</b>         | <b>565.31</b>         | <b>-1.72</b>        |
| CI                                 | .07, .12   | <b>.33, .42</b>  | -9.21, 103.15 | <b>590.35, 728.49</b> | <b>521.81, 611.08</b> | <b>-2.28, -1.23</b> |
| Non-AA (HA + WA) Participants Only |            |                  |               |                       |                       |                     |
| <i>z</i>                           | .19        | <b>3.80</b>      | 1.23          | <b>4.19</b>           | <b>3.73</b>           | -.51                |
| <i>p</i>                           | .85        | <b>&lt; .001</b> | .22           | <b>&lt; .001</b>      | <b>&lt; .001</b>      | .61                 |
| <i>b</i>                           | .003       | <b>.49</b>       | 71.77         | <b>499.05</b>         | <b>544.34</b>         | -.34                |
| CI                                 | -.007, .01 | <b>.47, .52</b>  | 33.48, 108.72 | <b>468.37, 534.73</b> | <b>520.98, 566.94</b> | -.77, .10           |

Note: Statistics are from three-path multi-level mediation analyses between painful stimulus intensity, the vmPFC-NAc pathway, and trial-by-trial pain rating. Path c = statistical relationship between X and Y. Path c' = statistical relationship between X and Y controlling for mediators. Bold:  $p \leq .05$ .



## Supplementary Table 7

*NPS regression analyses*

| Measure                                                                                       | <i>t</i>    | <i>df</i> | <i>p</i>         | <i>b</i>    | CI                |
|-----------------------------------------------------------------------------------------------|-------------|-----------|------------------|-------------|-------------------|
| Ethnic group differences in NPS response and its relationship with painful stimulus intensity |             |           |                  |             |                   |
| <b>Temp</b>                                                                                   | <b>8.11</b> | <b>84</b> | <b>&lt; .001</b> | <b>4.01</b> | <b>3.05, 4.97</b> |
| AA - (HA + WA) <sup>a</sup>                                                                   | -.92        | 83        | .36              | -2.93       | -9.02, 3.17       |
| HA - WA <sup>a</sup>                                                                          | .70         | 83        | .49              | 1.25        | -2.17, 4.66       |
| [AA - (HA + WA)] * Temp <sup>a</sup>                                                          | -.07        | 84        | .94              | -.08        | -2.19, 2.03       |
| [HA - WA] * Temp <sup>a</sup>                                                                 | .09         | 84        | .93              | .05         | -1.09, 1.20       |
| <b>Temp AA</b>                                                                                | <b>3.07</b> | <b>26</b> | <b>.005</b>      | <b>4.01</b> | <b>1.41, 6.63</b> |
| <b>Temp HA</b>                                                                                | <b>5.04</b> | <b>28</b> | <b>&lt; .001</b> | <b>4.10</b> | <b>2.48, 5.73</b> |
| <b>Temp WA</b>                                                                                | <b>7.11</b> | <b>28</b> | <b>&lt; .001</b> | <b>3.99</b> | <b>2.88, 5.08</b> |

Note: Statistics are from a linear mixed effects model in R with single heat trial ( $n = 36$ ) NPS pattern expression values as the dependent variable, participant gender, fMRI sequence, the two ethnicity contrasts and their interaction with painful stimulus intensity as fixed factors, and subject as a random factor with a random slope for temperature. Contrasts marked with the same letter (<sup>a</sup>) are from the same statistical model. Temp AA, Temp HA, and Temp WA refer to temperature effects from parallel models in each ethnic group separately. Temp = linear temperature contrast (L (-1), M (0), H (1)); AA = African American, HA = Hispanic American, WA = Non-Hispanic White American. Bold:  $p \leq .05$ .

Supplementary Table 8

*Results of stimulus-brain-pain mediation analyses with the NPS*

|                           | a                 | b                  | c'                    | c                     | ab                 |
|---------------------------|-------------------|--------------------|-----------------------|-----------------------|--------------------|
|                           | stim-brain        | brain-pain         | stim-pain             | stim-pain             | stim-brain-pain    |
| NPS                       |                   |                    |                       |                       |                    |
| <i>z</i>                  | <b>3.85</b>       | <b>3.59</b>        | <b>3.60</b>           | <b>3.60</b>           | <b>3.38</b>        |
| <i>p</i>                  | <b>&lt; .001</b>  | <b>&lt; .001</b>   | <b>&lt; .001</b>      | <b>&lt; .001</b>      | <b>&lt; .001</b>   |
| <i>b</i>                  | <b>3.69</b>       | <b>6.55</b>        | <b>510.81</b>         | <b>555.57</b>         | <b>20.03</b>       |
| CI                        | <b>2.94, 4.49</b> | <b>3.04, 10.46</b> | <b>458.25, 562.65</b> | <b>504.15, 605.75</b> | <b>9.31, 31.42</b> |
| NPS x Race (AA > HA + WA) |                   |                    |                       |                       |                    |
| <i>z</i>                  | -.67              | -.94               | .43                   | .34                   | -.14               |
| <i>p</i>                  | .50               | .35                | .67                   | .74                   | .89                |
| <i>b</i>                  | -.65              | -3.70              | 24.77                 | 20.53                 | -1.76              |
| CI                        | -2.50, 1.35       | -11.19, 2.80       | -92.88, 146.15        | -92.34, 143.02        | -24.61, 23.04      |

Note: Statistics are from a moderated, multi-level mediation analyses between painful stimulus intensity, NPS pattern expression, and trial-by-trial pain rating, moderated by participant ethnicity (AA – [HA + WA]) and controlling for participant gender, fMRI pulse sequence, and the [HA – WA] contrast. Bold:  $p \leq .05$ .

Supplementary Table 9

*Whole-brain ROI activity vs pain rating controlling for trial-by-trial head movement (geometric displacement)*

| Measure                                                          | <i>t</i>    | <i>df</i> | <i>p</i>         | <i>b</i>    | CI                 |
|------------------------------------------------------------------|-------------|-----------|------------------|-------------|--------------------|
| vmPFC relationships with pain rating and moderation by ethnicity |             |           |                  |             |                    |
| Pain Rating <sup>a</sup>                                         | -1.61       | 84        | .11              | -.002       | -.004, .004        |
| [AA - (HA + WA)] * Pain <sup>a</sup>                             | .56         | 84        | .58              | .001        | -.003, .005        |
| [HA – WA] * Pain <sup>a</sup>                                    | .22         | 84        | .82              | .0003       | -.003, .003        |
| mPFC relationships with pain rating and moderation by ethnicity  |             |           |                  |             |                    |
| Pain Rating <sup>b</sup>                                         | 1.44        | 84        | .15              | .002        | -.0006, .004       |
| [AA - (HA + WA)] * Pain <sup>b</sup>                             | .51         | 84        | .61              | .001        | -.004, .006        |
| [HA – WA] * Pain <sup>b</sup>                                    | .25         | 84        | .80              | .0004       | -.003, .004        |
| mFG relationships with pain rating and moderation by ethnicity   |             |           |                  |             |                    |
| <b>Pain Rating<sup>c</sup></b>                                   | <b>2.12</b> | <b>84</b> | <b>.04</b>       | <b>.002</b> | <b>.0002, .004</b> |
| <b>[AA - (HA + WA)] * Pain<sup>c</sup></b>                       | <b>2.24</b> | <b>84</b> | <b>.03</b>       | <b>.004</b> | <b>.0004, .008</b> |
| [HA – WA] * Pain <sup>c</sup>                                    | .62         | 84        | .54              | .0008       | -.002, .003        |
| NAc relationships with pain rating and moderation by ethnicity   |             |           |                  |             |                    |
| <b>Pain Rating<sup>d</sup></b>                                   | <b>3.43</b> | <b>84</b> | <b>&lt; .001</b> | <b>.003</b> | <b>.001, .005</b>  |
| [AA - (HA + WA)] * Pain <sup>d</sup>                             | -1.16       | 84        | .25              | -.002       | -.006, .001        |
| [HA – WA] * Pain <sup>d</sup>                                    | .62         | 84        | .54              | .0008       | -.002, .003        |

Note: Results mirror those reported in main text with the addition of a covariate for trial-by-trial head movement (geometric displacement in mm, see Methods for formula). Statistics are from linear mixed effects models in R with single heat trial ( $n = 36$ ) average values from each of the 4 ROIs (separate models) identified in the whole-brain GLM analysis comparing the strength of the dose-response relationship with painful heat in AA vs HA and WA participants as the dependent variable, participant gender and fMRI sequence as fixed factors, and subject as a random factor. Contrasts marked with the same letter (<sup>a-d</sup>) are from the same statistical model. Pain = area under the curve of single-trial, within-trial continuous pain intensity rating / 100; AA = African American, HA = Hispanic American, WA = Non-Hispanic White American. Bold:  $p \leq .05$ .

## Supplementary Table 10

## Average activity in GLM ROIs vs candidate sociocultural mediators controlling for trial-by-trial head movement (geometric displacement)

| Measure                                                     | <i>t</i>     | <i>df</i> | <i>p</i>         | <i>p</i> <sub>corr</sub> | <i>b</i>    | CI                |
|-------------------------------------------------------------|--------------|-----------|------------------|--------------------------|-------------|-------------------|
| Candidate mediator relationships with average NAc activity  |              |           |                  |                          |             |                   |
| Discrimination Frequency <sup>a</sup>                       | 3.09         | 74        | .003             | .09                      | .02         | .008, .04         |
| [AA - (HA + WA)] * Disc. Fr. <sup>a</sup>                   | 2.04         | 74        | .04              | 1                        | .04         | .0008, .07        |
| [HA – WA] * Disc. Fr. <sup>a</sup>                          | .31          | 74        | .76              | 1                        | .003        | -.01, .02         |
| <b>AA Disc. Fr.</b>                                         | <b>2.67</b>  | <b>20</b> | <b>.01</b>       |                          | <b>.05</b>  | <b>.01, .09</b>   |
| HA Disc. Fr.                                                | 1.59         | 24        | .12              |                          | .01         | -.004, .03        |
| WA Disc. Fr.                                                | .73          | 24        | .47              |                          | .006        | -.01, .02         |
| Experimenter Trust <sup>b</sup>                             | 1.02         | 77        | .31              | 1                        | .01         | -.01, .03         |
| <b>[AA - (HA + WA)] * Trust<sup>b</sup></b>                 | <b>-3.50</b> | <b>77</b> | <b>&lt; .001</b> | <b>.02</b>               | <b>-.08</b> | <b>-.12, -.03</b> |
| [HA – WA] * Trust <sup>b</sup>                              | .17          | 77        | .86              | 1                        | .002        | -.02, .03         |
| <b>AA Trust</b>                                             | <b>-1.88</b> | <b>23</b> | <b>.07</b>       |                          | <b>-.04</b> | <b>-.09, .005</b> |
| <b>HA Trust</b>                                             | <b>2.11</b>  | <b>25</b> | <b>.04</b>       |                          | <b>.03</b>  | <b>.0006, .05</b> |
| WA Trust                                                    | .29          | 23        | .77              |                          | .004        | -.02, .03         |
| Candidate mediator relationships with average mPFC activity |              |           |                  |                          |             |                   |
| Experimenter Trust <sup>c</sup>                             | .29          | 77        | .78              | 1                        | .004        | -.03, .03         |
| <b>[AA - (HA + WA)] * Trust<sup>c</sup></b>                 | <b>-3.34</b> | <b>77</b> | <b>.001</b>      | <b>.04</b>               | <b>-.10</b> | <b>-.16, -.04</b> |
| [HA – WA] * Trust <sup>c</sup>                              | .25          | 77        | .81              | 1                        | .005        | -.03, .04         |
| <b>Trust AA</b>                                             | <b>-2.42</b> | <b>23</b> | <b>.02</b>       |                          | <b>-.07</b> | <b>-.13, -.01</b> |
| Trust HA                                                    | .94          | 25        | .36              |                          | .02         | -.02, .06         |
| Trust WA                                                    | -.78         | 23        | .44              |                          | -.02        | -.07, .03         |

Note: Results mirror those reported in main text with the addition of a covariate for average head movement (geometric displacement in mm, see Online Methods for formula). Head movement covariate was averaged across all three temperatures to match the outcome variable. Only models with main effects or interactions with candidate mediators surviving correction for multiple comparisons (Bonferroni,  $p < .05$ ) are reported in table. Statistics are from linear models in R with average values from the brain regions showing a steeper dose-response relationship with painful stimulus intensity from whole-brain GLM analysis as the dependent variable. Separate models were run with activity within each ROI averaged across all three temperatures and average activity from the high minus the low temperature. Participant gender, fMRI sequence, each ethnicity contrast, the candidate sociocultural mediator (discrimination frequency, discrimination response, or experimenter trust demeaned within ethnic group), and the interaction between the sociocultural mediator and each ethnicity contrast were predictors. Contrasts marked with the same letter (<sup>a-c</sup>) are from the same statistical model. Rows ending in ethnicity abbreviations, e.g., “Trust AA” are parallel models in each ethnic group separately. Disc Fr. = Discrimination frequency, Trust = Experimenter Trust; AA = African American, HA = Hispanic American, WA = Non-Hispanic White American. *P* values for tests across groups are corrected by multiplying by 30 statistical tests using Bonferroni correction ( $p_{\text{corr}}$ ). Bold:  $p_{\text{corr}} \leq .05$ .

## Supplementary Table 11

*NPS regression analyses controlling for trial-by-trial head movement (geometric displacement)*

| Measure                                                                                              | <i>t</i>     | <i>df</i> | <i>p</i>          | <i>b</i>    | CI                |
|------------------------------------------------------------------------------------------------------|--------------|-----------|-------------------|-------------|-------------------|
| <b>Ethnic group differences in NPS response and its relationship with painful stimulus intensity</b> |              |           |                   |             |                   |
| <b>Temp</b>                                                                                          | <b>8.44</b>  | <b>84</b> | <b>&lt; .001</b>  | <b>4.14</b> | <b>3.18, 5.09</b> |
| AA - (HA + WA) <sup>a</sup>                                                                          | -.78         | 82        | .44               | -2.51       | -8.70, 3.69       |
| HA - WA <sup>a</sup>                                                                                 | .71          | 82        | .48               | 1.28        | -2.19, 4.74       |
| [AA - (HA + WA)] * Temp <sup>a</sup>                                                                 | .06          | 84        | .95               | .07         | -2.02, 2.15       |
| [HA - WA] * Temp <sup>a</sup>                                                                        | .15          | 84        | .88               | .08         | -1.04, 1.21       |
| <b>NPS relationships with pain rating and moderation by ethnicity</b>                                |              |           |                   |             |                   |
| <b>Pain Rating<sup>b</sup></b>                                                                       | <b>6.27</b>  | <b>84</b> | <b>&lt; .0001</b> | <b>.15</b>  | <b>.11, .20</b>   |
| <b>[AA - (HA + WA)] * Pain<sup>b</sup></b>                                                           | <b>-2.90</b> | <b>84</b> | <b>.005</b>       | <b>-.13</b> | <b>-.22, -.04</b> |
| [HA - WA] * Pain <sup>b</sup>                                                                        | -1.16        | 84        | .25               | -.04        | -.1, .03          |

Note: Results mirror those reported in main text with the addition of a covariate for trial-by-trial head movement (geometric displacement in mm, see Methods for formula). Statistics are from linear mixed effects models in R with single heat trial ( $n = 36$ ) NPS pattern expression values as the dependent variable, participant gender, fMRI sequence, geometric displacement, the two ethnicity contrasts and their interaction with stimulus temperature and pain rating (model <sup>b</sup>) as fixed factors, and subject as a random factor. Contrasts marked with the same letter (<sup>a-b</sup>) are from the same statistical model. Model <sup>a</sup> also had a random slope for temperature by subject. Temp = linear temperature contrast (L (-1), M (0), H (1)); Pain = area under the curve of single-trial, within-trial continuous pain intensity rating / 100; AA = African American, HA = Hispanic American, WA = Non-Hispanic White American. Bold:  $p \leq .05$ .
